# Supplementary material for: An Evaluation of Aluminum Tolerant Pseudomonas aeruginosa A7 for In Vivo Suppression of Fusarium Wilt of Chickpea Caused by Fusarium oxysporum f. sp. ciceris and Growth Promotion of Chickpea
Source: MDPI journal article supplement (doi:10.3390/microorganisms10030568), 2022-03-05
Supplement: s1 [file s1]

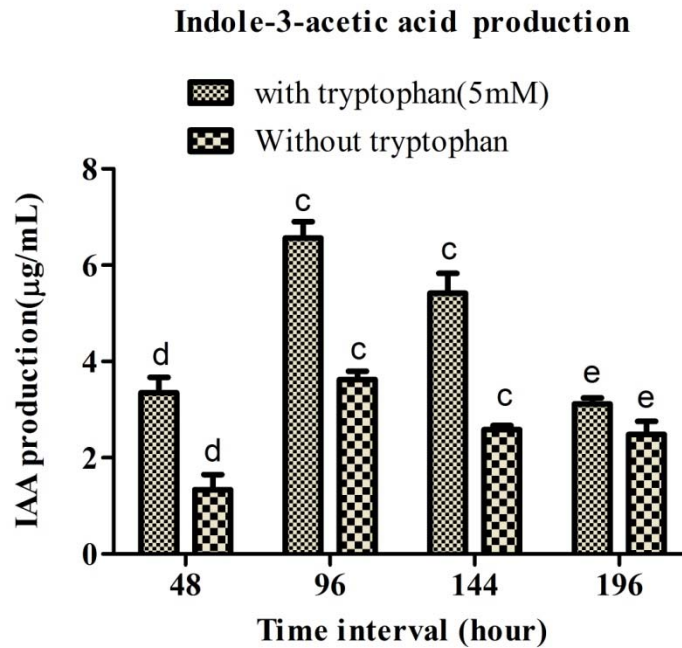

**Figure S1.** Bar diagram showing the affect of production of Indole -3- acetic acid in presence (5 mM) and absence of L-tryptophan on by the bacterial strain A7 with 48 h time interval for 196 hours. Values are expressed as means  $n = 3 \pm$  Standard Error Mean (SEM). Statistical differences were analyzed by two-way analysis of variances (ANOVA). Significant differences (followed by Bonferroni Posttests) compared with the presence and absence of L-tryptophan are indicated by letters c, d and e.
