# Supplementary material for: An Evaluation of Aluminum Tolerant Pseudomonas aeruginosa A7 for In Vivo Suppression of Fusarium Wilt of Chickpea Caused by Fusarium oxysporum f. sp. ciceris and Growth Promotion of Chickpea
Source: MDPI journal article supplement (doi:10.3390/microorganisms10030568), 2022-03-05
Supplement: s1 [file s1]

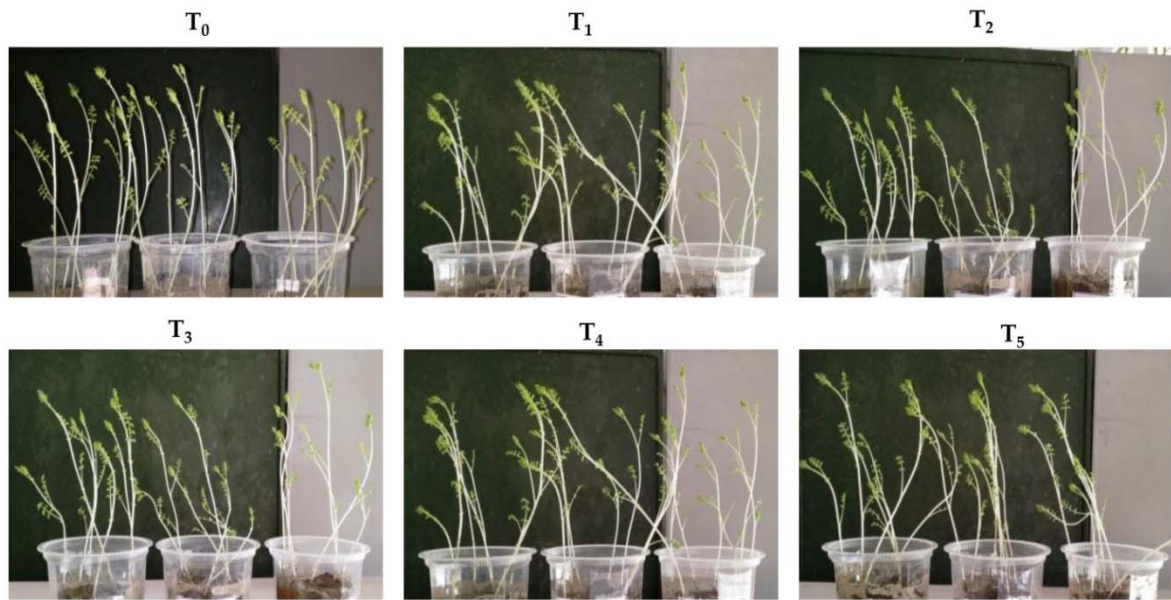

**Figure S2A.** *In vivo* establishment and control of Fusarium wilt disease of chickpea caused by *Fusarium oxysporum* sp. f. *ciceris* by the bacterial strain A7 at first day (Day-1) of inoculation with the treatments as T<sub>0</sub> = Sterile distilled water as control, T<sub>1</sub> = Only bacterial cell suspension, T<sub>2</sub> = Only fungal spore suspension, T<sub>3</sub> = Bacterial cell suspension and fungal spore suspension, T<sub>4</sub> = Bacterial cell suspension two days before the fungal spore suspension and T<sub>5</sub> = Fungal spore suspension two days before the bacterial cell suspension at room temperature in three biological replicates.
